# Supplementary material for: Distinct fermentation of human milk oligosaccharides 3-FL and LNT2 and GOS/inulin by infant gut microbiota and impact on adhesion ofLactobacillus plantarumWCFS1 to gut epithelial cells
Source: Royal Society of Chemistry journal article supplement (doi:10.1039/d1fo02563e), 2021-01-01
Supplement: d1fo02563e2.pdf [file d1fo02563e2.pdf]

Supplementary Table 1. Relative abundance of each phylum by GOS/inulin, 3-FL, and LNT2 fermentation at T0, T14, T24, and T36. Control is set without GOS/inulin, 3-FL, or LNT2.

| Taxonomy                      | Proteobacteria | Actinobacteria | Bacteroidetes | Firmicutes  | Verrucomicrobia | Cyanobacteria | Patescibacteria | Others      |
|-------------------------------|----------------|----------------|---------------|-------------|-----------------|---------------|-----------------|-------------|
| T <sub>0</sub> -1             | 0.289458284    | 0.628691182    | 0.05066034    | 0.031142744 | 0               | 0             | 0               | 4.74E-05    |
| T <sub>0</sub> -2             | 0.335468565    | 0.586366153    | 0.047576117   | 0.030541716 | 0               | 1.58E-05      | 0               | 3.16E-05    |
| Control T <sub>14</sub> -1    | 0.934139976    | 0.029197311    | 0.015310399   | 0.021209964 | 0               | 0             | 0               | 0.000142349 |
| Control T <sub>14</sub> -2    | 0.8552155      | 0.080806643    | 0.040601028   | 0.023107948 | 7.91E-05        | 3.16E-05      | 0               | 0.000158165 |
| Control T <sub>24</sub> -1    | 0.825005931    | 0.028390668    | 0.131293001   | 0.015199684 | 0               | 1.58E-05      | 0               | 9.49E-05    |
| Control T <sub>24</sub> -2    | 0.709798339    | 0.072471333    | 0.204096481   | 0.013491499 | 0               | 0             | 0               | 0.000142349 |
| Control T <sub>36</sub> -1    | 0.711237643    | 0.026587584    | 0.242024516   | 0.019976275 | 0               | 0             | 0               | 0.000173982 |
| Control T <sub>36</sub> -2    | 0.637690787    | 0.082941874    | 0.259549229   | 0.019739027 | 0               | 0             | 0               | 7.91E-05    |
| GOS/inulin T <sub>14</sub> -1 | 0.735357849    | 0.238481613    | 0.014250692   | 0.010786872 | 0               | 0             | 0               | 0.001122974 |
| GOS/inulin T <sub>14</sub> -2 | 0.722024516    | 0.222222222    | 0.032740214   | 0.022712535 | 0               | 3.16E-05      | 0               | 0.000268881 |
| GOS/inulin T <sub>24</sub> -1 | 0.63735864     | 0.315476473    | 0.029782523   | 0.016370107 | 7.91E-05        | 0             | 0               | 0.000933175 |
| GOS/inulin T <sub>24</sub> -2 | 0.600695927    | 0.343361012    | 0.028754448   | 0.026967181 | 0               | 0             | 0               | 0.000221431 |
| GOS/inulin T <sub>36</sub> -1 | 0.543519178    | 0.438750494    | 0.007987347   | 0.008873072 | 0               | 1.58E-05      | 0               | 0.000854093 |
| GOS/inulin T <sub>36</sub> -2 | 0.561897983    | 0.411751681    | 0.013444049   | 0.012637406 | 0               | 1.58E-05      | 0               | 0.000253064 |
| 3-FL T <sub>14</sub> -1       | 0.815436932    | 0.12569395     | 0.011229735   | 0.047180704 | 0               | 0             | 0               | 0.000458679 |
| 3-FL T <sub>14</sub> -2       | 0.714543298    | 0.197026493    | 0.042198497   | 0.045567418 | 3.16E-05        | 6.33E-05      | 0               | 0.000569395 |
| 3-FL T <sub>24</sub> -1       | 0.815326216    | 0.07694741     | 0.060482404   | 0.046674575 | 0               | 0             | 0               | 0.000569395 |
| 3-FL T <sub>24</sub> -2       | 0.630241202    | 0.114638197    | 0.211198102   | 0.043384737 | 0               | 3.16E-05      | 0               | 0.000506129 |
| 3-FL T <sub>36</sub> -1       | 0.74359826     | 0.103550811    | 0.088540925   | 0.063819692 | 0               | 0             | 0               | 0.000490312 |
| 3-FL T <sub>36</sub> -2       | 0.592740214    | 0.119762752    | 0.208050613   | 0.079161724 | 1.58E-05        | 0             | 0               | 0.000268881 |
| LNT2 T <sub>14</sub> -1       | 0.739027284    | 0.233562673    | 0.013032819   | 0.013554765 | 0               | 1.58E-05      | 0               | 0.000806643 |
| LNT2 T <sub>14</sub> -2       | 0.741921708    | 0.206911823    | 0.025053381   | 0.02587584  | 3.16E-05        | 3.16E-05      | 0               | 0.000173982 |
| LNT2 T <sub>24</sub> -1       | 0.735373665    | 0.217208383    | 0.025401344   | 0.021194148 | 7.91E-05        | 0             | 1.58E-05        | 0.00072756  |
| LNT2 T <sub>24</sub> -2       | 0.689284302    | 0.228580467    | 0.035745354   | 0.045931198 | 0               | 0             | 0               | 0.000458679 |
| LNT2 T <sub>36</sub> -1       | 0.628137604    | 0.291498616    | 0.043954132   | 0.036061684 | 0               | 3.16E-05      | 0               | 0.000316331 |
| LNT2 T <sub>36</sub> -2       | 0.58059312     | 0.285092922    | 0.085140372   | 0.048999605 | 0               | 4.74E-05      | 0               | 0.000126532 |
