# Supplementary material for: Distinct fermentation of human milk oligosaccharides 3-FL and LNT2 and GOS/inulin by infant gut microbiota and impact on adhesion ofLactobacillus plantarumWCFS1 to gut epithelial cells
Source: Royal Society of Chemistry journal article supplement (doi:10.1039/d1fo02563e), 2021-01-01
Supplement: d1fo02563e3.pdf [file d1fo02563e3.pdf]

Supplementary Table 2. Relative abundance of top 10 genera by GOS/inulin, 3-FL, and LNT2 fermentation at T0, T14, T24, and T36. Control is set without GOS/inulin, 3-FL, or LNT2.

| Taxonomy                      | <i>Escherichia-Shigella</i> | <i>Bifidobacterium</i> | <i>Bacteroides</i> | <i>Collinsella</i> | <i>Enterococcus</i> | <i>Sutterella</i> | <i>Citrobacter</i> | <i>Lachnospiraceae_NK4A136_group</i> | <i>Parabacteroides</i> | <i>UBA1819</i> |
|-------------------------------|-----------------------------|------------------------|--------------------|--------------------|---------------------|-------------------|--------------------|--------------------------------------|------------------------|----------------|
| T <sub>0</sub> -1             | 0.281233689                 | 0.468105971            | 0.043226572        | 0.157580071        | 0.002040332         | 0.000347964       | 0.000332147        | 0.000253064                          | 0.00113879             | 0.013317517    |
| T <sub>0</sub> -2             | 0.327386319                 | 0.436362198            | 0.035618822        | 0.146982997        | 0.002166864         | 0.00072756        | 0.000458679        | 0.001265322                          | 0.001328588            | 0.01102412     |
| Control T <sub>14</sub> -1    | 0.925614868                 | 0.027141163            | 0.012257809        | 0.00186635         | 0.015041518         | 0.000427046       | 9.49E-05           | 0.002198497                          | 0.000379597            | 0.000648478    |
| Control T <sub>14</sub> -2    | 0.851293001                 | 0.070858047            | 0.03389482         | 0.009553183        | 0.013333333         | 0.000996441       | 9.49E-05           | 0.00072756                           | 0.00109134             | 0.001724002    |
| Control T <sub>24</sub> -1    | 0.817002768                 | 0.024974298            | 0.123274021        | 0.003131673        | 0.008287861         | 0.000585212       | 0.000205615        | 0.002214314                          | 0.003194939            | 0.000838276    |
| Control T <sub>24</sub> -2    | 0.678386714                 | 0.066967181            | 0.193973903        | 0.005314353        | 0.007718466         | 0.029244761       | 0.000110716        | 0.001834717                          | 0.007101621            | 0.000664294    |
| Control T <sub>36</sub> -1    | 0.691814947                 | 0.023060498            | 0.229561091        | 0.003226572        | 0.013380783         | 0.007639383       | 0.003558719        | 0.002862792                          | 0.007813365            | 0.000616845    |
| Control T <sub>36</sub> -2    | 0.538473705                 | 0.076567813            | 0.241929616        | 0.006026097        | 0.012858837         | 0.049853697       | 0.0323448          | 0.00072756                           | 0.013823646            | 0.000743377    |
| GOS/inulin T <sub>14</sub> -1 | 0.731277185                 | 0.233436141            | 0.009410834        | 0.004744958        | 0.00232503          | 0.000347964       | 0.000142349        | 0.003764334                          | 0.000506129            | 0.000901542    |
| GOS/inulin T <sub>14</sub> -2 | 0.704230921                 | 0.216797153            | 0.01681297         | 0.004934757        | 0.001771451         | 0.001296955       | 0.008050613        | 0.00719652                           | 0.000964808            | 0.002182681    |
| GOS/inulin T <sub>24</sub> -1 | 0.623171214                 | 0.308912614            | 0.013950178        | 0.00610518         | 0.00341637          | 0.001391854       | 0.003890866        | 0.002989324                          | 0.001202056            | 0.001107157    |
| GOS/inulin T <sub>24</sub> -2 | 0.594211151                 | 0.337935943            | 0.01635429         | 0.004982206        | 0.002261764         | 0.001043891       | 0.000126532        | 0.010011862                          | 0.001360221            | 0.002973507    |
| GOS/inulin T <sub>36</sub> -1 | 0.540308422                 | 0.428026888            | 0.00533017         | 0.010407276        | 0.006263345         | 0.000221431       | 0.000126532        | 0.000300514                          | 0.000189798            | 0.000300514    |
| GOS/inulin T <sub>36</sub> -2 | 0.559731119                 | 0.402672993            | 0.006184263        | 0.008857256        | 0.005519968         | 0.000332147       | 0.000110716        | 0.001518387                          | 0.000221431            | 0.000253064    |
| 3-FL T <sub>14</sub> -1       | 0.81143535                  | 0.124808225            | 0.007497034        | 0.000838276        | 0.03881376          | 0.000205615       | 0.000142349        | 0.003716884                          | 0.000158165            | 0              |
| 3-FL T <sub>14</sub> -2       | 0.709149862                 | 0.183376829            | 0.031190194        | 0.013507315        | 0.032676947         | 0.001107157       | 0.000110716        | 0.001107157                          | 0.000806643            | 0.000173982    |
| 3-FL T <sub>24</sub> -1       | 0.810850138                 | 0.074748913            | 0.052953737        | 0.001992883        | 0.038339265         | 0.000901542       | 0.000158165        | 0.00346382                           | 0.001170423            | 0              |
| 3-FL T <sub>24</sub> -2       | 0.605725583                 | 0.101953341            | 0.202720443        | 0.01257414         | 0.035587189         | 0.022586002       | 0.000142349        | 0.00346382                           | 0.00346382             | 4.74E-05       |
| 3-FL T <sub>36</sub> -1       | 0.724982206                 | 0.097366548            | 0.079414788        | 0.005994464        | 0.054503756         | 0.008809806       | 0.004792408        | 0.005519968                          | 0.002530645            | 0              |
| 3-FL T <sub>36</sub> -2       | 0.50173191                  | 0.102902333            | 0.196235666        | 0.016591538        | 0.071316726         | 0.03357849        | 0.049695532        | 0.000964808                          | 0.006073547            | 0              |
| LNT2 T <sub>14</sub> -1       | 0.736559905                 | 0.229798339            | 0.009347568        | 0.003669435        | 0.00760775          | 0.000205615       | 9.49E-05           | 0.003068406                          | 0.000189798            | 1.58E-05       |
| LNT2 T <sub>14</sub> -2       | 0.724808225                 | 0.20305259             | 0.011213919        | 0.003653618        | 0.006358244         | 0.000759193       | 0.008667457        | 0.008351127                          | 0.000379597            | 0.000205615    |
| LNT2 T <sub>24</sub> -1       | 0.722910241                 | 0.204887307            | 0.010691973        | 0.012068011        | 0.008983788         | 0.00077501        | 0.004064848        | 0.003448003                          | 0.000442863            | 0              |
| LNT2 T <sub>24</sub> -2       | 0.68072756                  | 0.218442072            | 0.017809411        | 0.009948596        | 0.011229735         | 0.000885726       | 0.000158165        | 0.016828786                          | 0.000632661            | 0.000253064    |
| LNT2 T <sub>36</sub> -1       | 0.621984974                 | 0.194590747            | 0.002356663        | 0.096559905        | 0.007497034         | 0                 | 7.91E-05           | 0.01252669                           | 0.000142349            | 0.001012258    |
| LNT2 T <sub>36</sub> -2       | 0.574614472                 | 0.179565045            | 0.00227758         | 0.105227363        | 0.005172005         | 0                 | 4.74E-05           | 0.019106366                          | 4.74E-05               | 0.000427046    |
